# Supplementary material for: Activation of VIP interneurons in the prefrontal cortex ameliorates neuropathic pain aversiveness
Source: PubMed Central journal article supplement — Cell Rep. Author manuscript; Available in PMC 2022 Sep 29. (PMC9520588; doi:10.1016/j.celrep.2022.111333), 2022-09-13
Supplement: NIHMS1836249-supplement-1.pdf [file NIHMS1836249-supplement-1.pdf]

**Cell Reports, Volume 40**

**Supplemental information**

**Activation of VIP interneurons  
in the prefrontal cortex  
ameliorates neuropathic pain aversiveness**

**Miao Li, Hang Zhou, Sasa Teng, and Guang Yang**

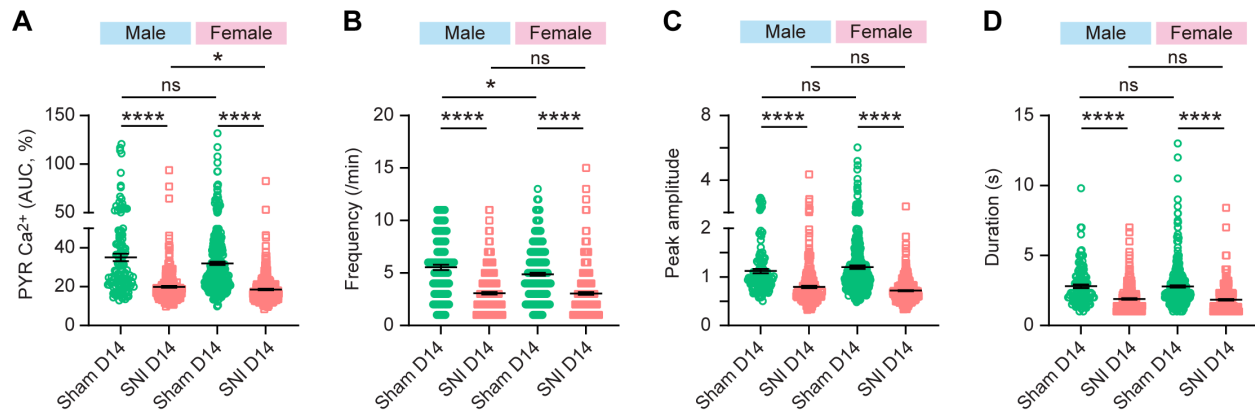

**Figure S1. Neuropathic pain decreases pyramidal neuron  $\text{Ca}^{2+}$  activity in PL of male and female mice, related to Figure 1**

(A) SNI decreases pyramidal neuron (PYR)  $\text{Ca}^{2+}$  activity in both male ( $P < 0.0001$ ) and female ( $P < 0.0001$ ) mice. 14 days after SNI, AUC is slightly higher in males than females ( $P = 0.0171$ ). Within the sham group, no significant difference between males and females ( $P = 0.6358$ ).

(B) SNI decreases PYR  $\text{Ca}^{2+}$  frequency in both male ( $P < 0.0001$ ) and female ( $P < 0.0001$ ) mice. Within the sham group, frequency is slightly higher in males than females ( $P = 0.0279$ ). Within the SNI group, no significant difference between males and females ( $P = 0.3833$ ).

(C) SNI decreases peak amplitude of PYR  $\text{Ca}^{2+}$  transients in both male ( $P < 0.0001$ ) and female ( $P < 0.0001$ ) mice. No difference between males and females within the sham ( $P = 0.2165$ ) and SNI ( $P = 0.1464$ ) group.

(D) SNI decreases  $\text{Ca}^{2+}$  transient duration in both male ( $P < 0.0001$ ) and female ( $P < 0.0001$ ) mice. No difference between males and females within the sham ( $P = 0.7705$ ) and SNI ( $P = 0.5056$ ) group.

In (A–D),  $n = 121, 292$  cells from 2, 3 males;  $n = 365, 341$  cells from 3, 4 females; sham and SNI respectively.

Individual dots represent data from a single cell. Summary data are presented as mean  $\pm$  S.E.M. \* $P < 0.05$ , \*\*\*\* $P < 0.0001$ ; ns, not significant; by Mann-Whitney test.

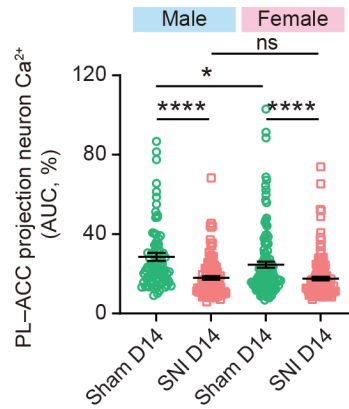

**Figure S2. Neuropathic pain decreases the  $\text{Ca}^{2+}$  activity of PL neurons projecting to ACC, regardless of the sex of animals, related to Figure 2**

SNI decreases  $\text{Ca}^{2+}$  activity in PL-ACC projection neurons in both male ( $P < 0.0001$ ; sham,  $n = 88$  cells from 3 mice; SNI,  $n = 113$  cells from 4 mice) and female mice ( $P < 0.0001$ ; sham,  $n = 126$  cells from 4 mice; SNI,  $n = 136$  cells from 4 mice). No difference between males and females within the SNI group ( $P = 0.6981$ ).

Individual dots represent data from a single cell. Summary data are presented as mean  $\pm$  S.E.M. \* $P < 0.05$ , \*\*\*\* $P < 0.0001$ ; ns, not significant; by Mann-Whitney test.

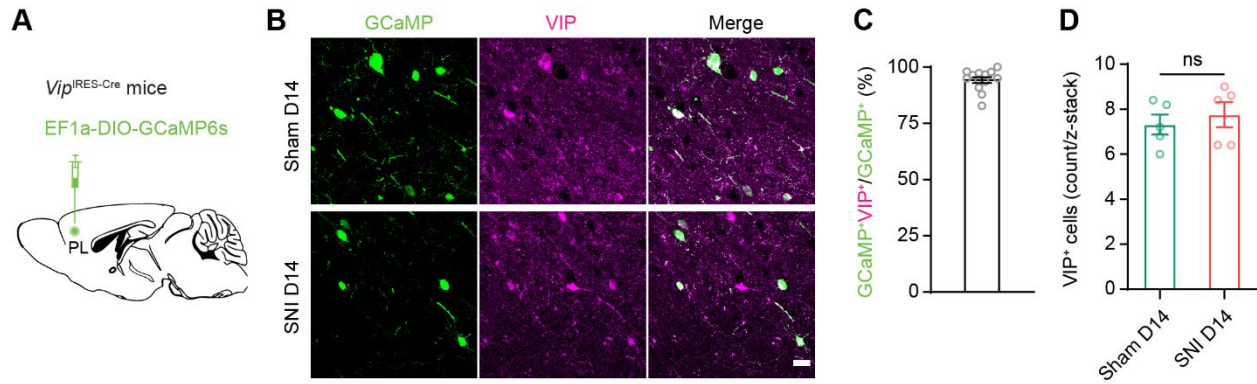

**Figure S3. Neuropathic pain has no effects on VIP interneuron density in PL, related to Figure 3**

(A) Experimental design to specifically express GCaMP6s in VIP interneurons in the mouse PL.

(B) Representative fluorescence images of PL neurons showing the colocalization of GCaMP fluorescence and anti-VIP immunoreactivity. Scale bar, 20  $\mu$ m.

(C) Percentage of colocalized somas in PL to estimate the specificity of Cre-mediated GCaMP expression ( $n = 13$  sections from 4 mice).  $94.26 \pm 1.30\%$  of GCaMP-expressing cells are colocalized with anti-VIP immunoreactivity.

(D) The number of VIP-expressing interneurons (per  $200 \mu\text{m} \times 200 \mu\text{m} \times 20 \mu\text{m}$ ) in PL 14 days after sham or SNI surgery ( $P = 0.4603$ ,  $n = 5$  sections from 2 mice per group).

Individual dots represent data from a single section. Summary data are mean  $\pm$  S.E.M. ns, not significant; by Mann-Whitney test.

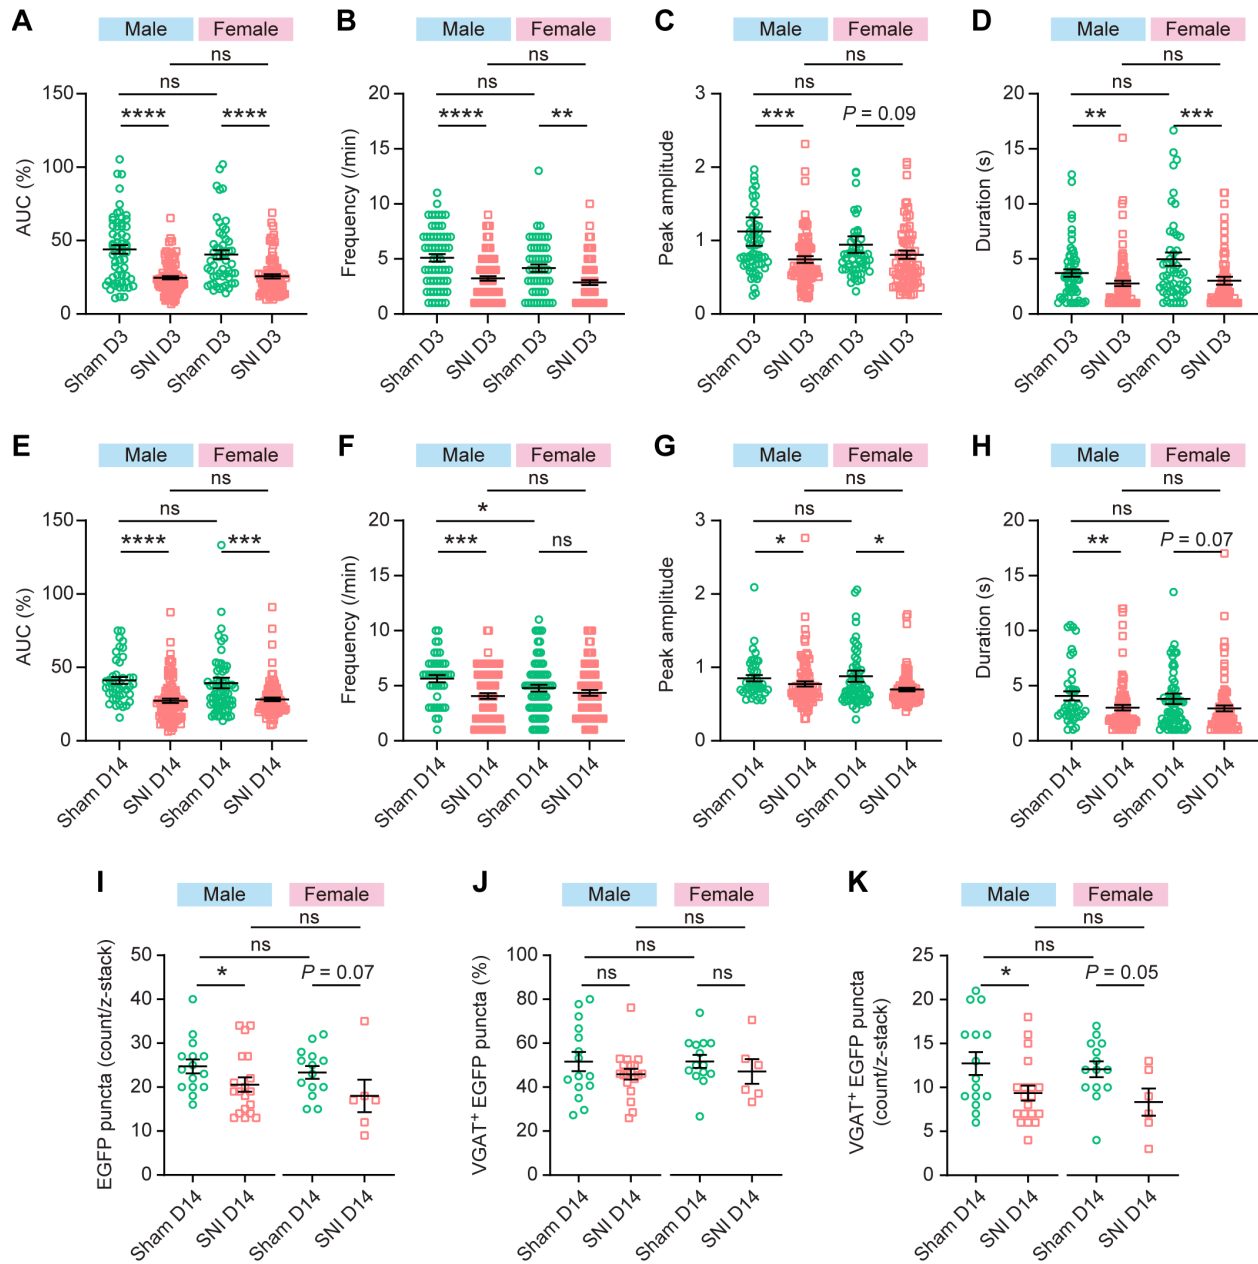

**Figure S4. Neuropathic pain decreases  $\text{Ca}^{2+}$  activity and presynaptic terminal number in VIP interneurons, regardless of the sex of animals, related to Figure 3**

(A) SNI decreases VIP  $\text{Ca}^{2+}$  activity in male ( $P < 0.0001$ ) and female ( $P < 0.0001$ ) mice 3 days after surgery. No difference between males and females within the sham or SNI group (sham:  $P = 0.3195$ , SNI:  $P = 0.9287$ ).

(B) SNI decreases VIP  $\text{Ca}^{2+}$  frequency in male ( $P < 0.0001$ ) and female ( $P = 0.0011$ ) mice 3 days after surgery. No difference between males and females within the sham or SNI group (sham:  $P = 0.0547$ , SNI:  $P = 0.1549$ ).

(C) SNI decreased VIP Ca<sup>2+</sup> peak amplitude in male ( $P = 0.0001$ ) and female ( $P = 0.0900$ , a trend) mice 3 days after surgery. No difference between males and females within the sham or SNI group (sham:  $P = 0.1761$ , SNI:  $P = 0.4860$ ).

(D) SNI decreases VIP Ca<sup>2+</sup> duration in male ( $P = 0.0024$ ) and female ( $P = 0.0002$ ) mice 3 days after surgery. No difference between males and females within the sham or SNI group (sham:  $P = 0.3238$ , SNI:  $P = 0.8011$ ).

In (A–D),  $n = 60$ , 94 cells from 3, 6 males,  $n = 53$ , 83 cells from 3, 6 females.

(E) SNI decreases VIP neuron Ca<sup>2+</sup> activity in male ( $P < 0.0001$ ) and female ( $P = 0.0004$ ) mice 14 days after surgery. No difference between males and females within the sham or SNI group (sham:  $P = 0.0523$ , SNI:  $P = 0.3467$ ).

(F) SNI decreases VIP Ca<sup>2+</sup> frequency in male ( $P = 0.0006$ ) but not female ( $P = 0.2679$ ) mice 14 days after surgery. Within the sham group, the frequency is slightly lower in females ( $P = 0.0315$ ). No difference between males and females within the SNI group ( $P = 0.4537$ ).

(G) SNI decreases VIP Ca<sup>2+</sup> peak amplitude in male ( $P = 0.0176$ ) and female ( $P = 0.0292$ ) mice 14 days after surgery. No difference between males and females within the sham or SNI group (sham:  $P = 0.1122$ , SNI:  $P = 0.0975$ ).

(H) SNI decreases VIP Ca<sup>2+</sup> duration in male ( $P = 0.0022$ ) and female ( $P = 0.0729$ , a trend) mice 14 days after surgery. No difference between males and females within the sham or SNI group (sham:  $P = 0.1811$ , SNI:  $P = 0.7159$ ).

In (E–H),  $n = 42$ , 91 cells from 3, 4 males,  $n = 70$ , 91 cells from 3, 4 females.

(I) The count of VIP presynaptic EGFP puncta (per  $30 \mu\text{m} \times 30 \mu\text{m} \times 20 \mu\text{m}$ ) in PL of male ( $P = 0.0453$ ) and female ( $P = 0.0790$ , a trend) mice 14 days after sham or SNI. No difference between males and females (sham:  $P = 0.6894$ , SNI:  $P = 0.3089$ ).

(J) Percentage of VIP EGFP puncta colocalized with VGAT in male ( $P = 0.5774$ ) and female ( $P = 0.3956$ ) mice 14 days after sham or SNI. No difference between males and females (sham:  $P = 0.6749$ , SNI:  $P = 0.9386$ ).

(K) The count of VGAT<sup>+</sup> EGFP puncta (per  $30 \mu\text{m} \times 30 \mu\text{m} \times 20 \mu\text{m}$ ) in PL of male ( $P = 0.0446$ ) and female ( $P = 0.0521$ , a trend) mice 14 days after sham or SNI. No difference between males and females (sham:  $P = 0.9742$ , SNI:  $P = 0.6270$ ).

In (I–K),  $n = 15$ , 19 sections from 2, 3 males,  $n = 14$ , 6 sections from 2, 2 females.

Throughout, individual dots represent data from a single cell or section. Summary data are mean  $\pm$  S.E.M. \* $P < 0.05$ , \*\* $P < 0.01$ , \*\*\* $P < 0.001$ , \*\*\*\* $P < 0.0001$ ; ns, not significant; by Mann-Whitney test.

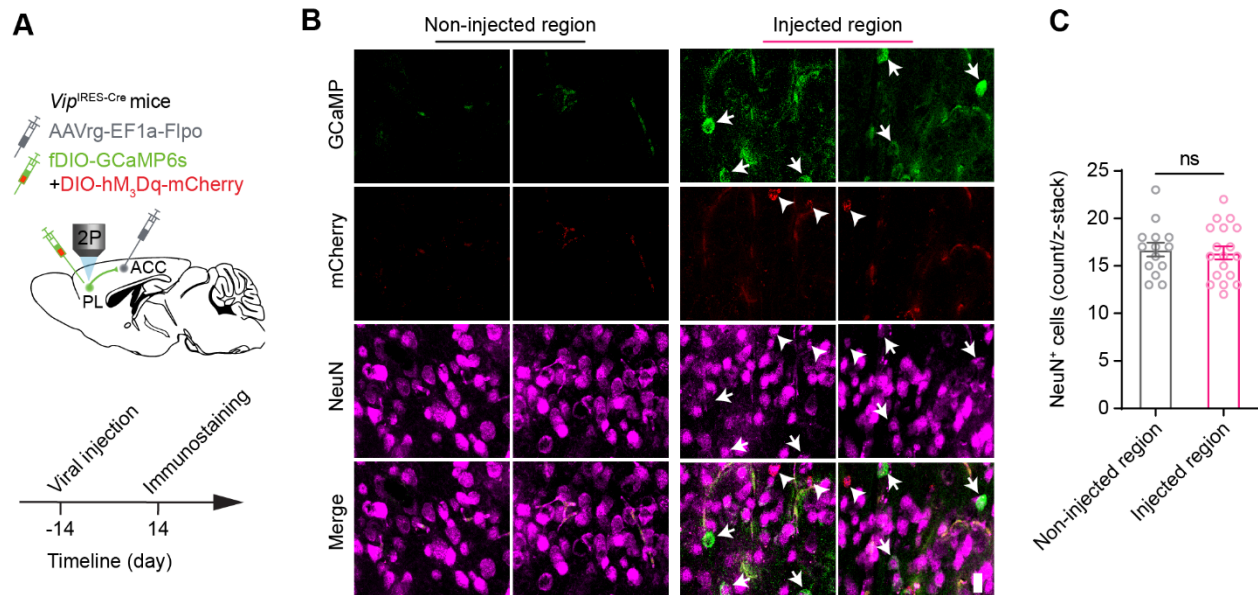

**Figure S5. Injection of multiple viruses has no detectable effects on neuronal density in the injected regions, related to Figure 4**

(A) Experimental design to virally express GCaMP6s in PL–ACC projection neurons and hM<sub>3</sub>Dq-mCherry in PL VIP interneurons. Four weeks after viral infection, cortical sections were immunostained for NeuN, a neuronal marker.

(B) Immunofluorescence images showing NeuN<sup>+</sup> cells in the cortical regions with or without viral injections. Arrows indicate virus targeted PL–ACC neurons expressing GCaMP6. Arrowheads indicate virus targeted VIP cells expressing hM<sub>3</sub>Dq-mCherry. Scale bar, 20  $\mu$ m.

(C) The number of NeuN<sup>+</sup> cells (per 100  $\mu$ m  $\times$  100  $\mu$ m  $\times$  20  $\mu$ m) in the cortical regions with or without viral injections ( $P = 0.7560$ ,  $n = 14$ , 18 fields of view from 3 mice). Individual dots represent data from a single field of view. Summary data are mean  $\pm$  S.E.M. ns, not significant; by Mann-Whitney test.

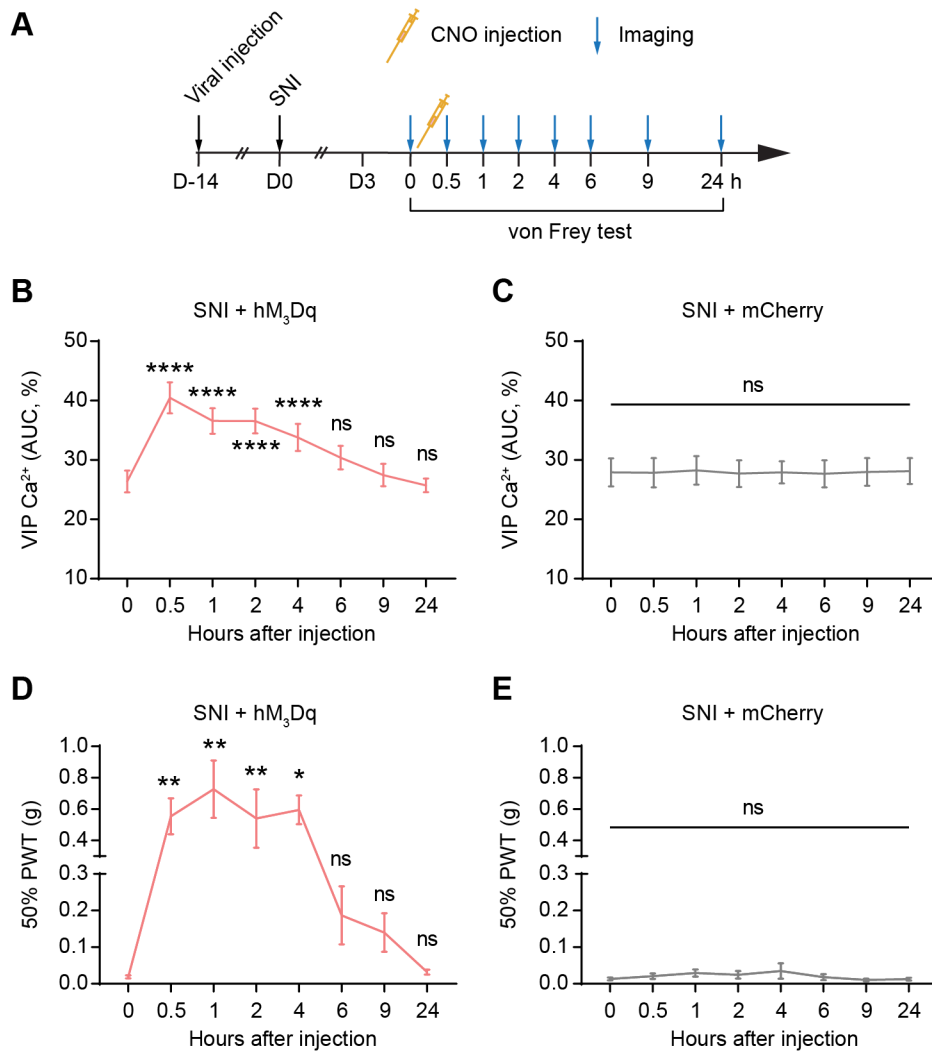

**Figure S6. A single injection of CNO transiently suppresses VIP interneuron activity in PL and mechanical allodynia in mice, related to Figure 5**

(A) Experimental design to examine the acute effects of hM<sub>3</sub>Dq activation on VIP interneuron activity in PL and mechanical pain thresholds (von Frey test) in mice at day 3 post-SNI.

(B) VIP Ca<sup>2+</sup> activity before and after a single CNO injection in SNI mice expressing hM<sub>3</sub>Dq ( $P < 0.0001$  for 0.5, 1, 2, 4 h vs. baseline,  $P = 0.0828$ ,  $> 0.9999$ ,  $> 0.9999$  for 6, 9, 24 h vs. baseline;  $n = 145$  cells from 4 mice).

(C) VIP Ca<sup>2+</sup> activity before and after a single CNO injection in SNI mice expressing mCherry ( $P > 0.9999$ ,  $> 0.9999$ ,  $> 0.9999$ ,  $= 0.1443$ ,  $> 0.9999$ ,  $> 0.9999$ ,  $> 0.9999$  for 0.5, 1, 2, 4, 6, 9, 24 h vs. baseline;  $n = 115$  cells from 3 mice).

(D) Time course of mechanical pain thresholds before and after a single CNO injection in SNI mice expressing hM<sub>3</sub>Dq in PL VIP neurons ( $P = 0.0087$ ,  $0.0055$ ,  $0.0087$ ,  $0.0109$  for 0.5, 1, 2, 4 h vs. baseline,  $P = 0.9635$ ,  $> 0.9999$ ,  $> 0.9999$  for 6, 9, 24 h vs. baseline;  $n = 5$  mice). PWT, paw withdrawal threshold.



(E) Time course of mechanical pain thresholds before and after a single CNO injection in SNI mice expressing mCherry in PL VIP neurons ( $P > 0.9999$ ,  $= 0.9850$ ,  $= 0.9850$ ,  $> 0.9999$ ,  $> 0.9999$ ,  $> 0.9999$ ,  $> 0.9999$  for 0.5, 1, 2, 4, 6, 9, 24 h vs. baseline;  $n = 6$  mice).

Data are presented as mean  $\pm$  S.E.M.  $*P < 0.05$ ,  $**P < 0.01$ ,  $****P < 0.0001$ ; ns, not significant; by Friedman test followed by Dunn's multiple comparisons test.

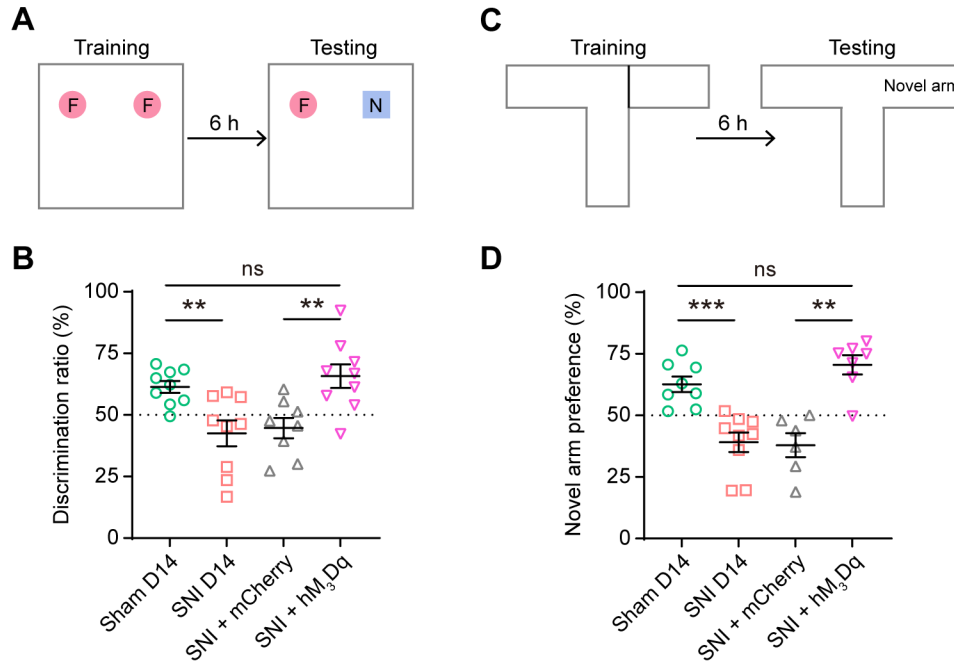

**Figure S7. Daily activation of VIP interneurons following nerve injury ameliorates cognitive impairments associated with neuropathic pain, related to Figure 5**

(A) Schematic and timeline for the novel object recognition (NOR) test, which measures the animal's recognition memory, based on the willingness of rodents to explore a novel object. F, familiar object; N, novel object.

(B) Discrimination ratio of sham and SNI mice 14 days after surgery ( $P = 0.0056$ ). Daily activation of PL VIP interneurons prevents recognition memory impairment after SNI ( $P = 0.0055$  vs. mCherry;  $P = 0.5457$  vs. sham).  $n = 9, 9, 8, 9$  mice.

(C) Schematic and timeline for the T maze test, which measures the animal's spatial memory, based on the willingness of rodents to explore a new environment.

(D) Percentage of time spent in the novel arm during a T maze test 14 days after sham or SNI surgery ( $P = 0.0002$ ). Daily activation of PL VIP interneurons prevents spatial memory impairment after SNI ( $P = 0.0023$  vs. mCherry;  $P = 0.1206$  vs. sham).  $n = 8, 9, 6, 7$  mice.

Individual dots represent data from a single mouse. Summary data are mean  $\pm$  S.E.M.  $**P < 0.01$ ,  $***P < 0.001$ ; ns, not significant; by Mann-Whitney test.
